# Supplementary material for: Emerging environmental contaminants at the air/aqueous and biological soft interfaces
Source: Royal Society of Chemistry journal article supplement (doi:10.1039/d2va00081d), 2022-01-01
Supplement: d2va00081d1.pdf [file d2va00081d1.pdf]

## Electronic Supplementary Information

### Emerging Environmental Contaminants at the Air/Aqueous and Biological Soft Interfaces

Giada Dalla-Pozza, Danielle Deardorff, Mahamud Subir\*

Figure A.1 shows the surface tension vs. concentration (shown in log-scale) data for the various compounds studied. The polynomial fit equation has the general form:

$$\gamma = A + B_1(\log C) + B_2(\log C)^2 + B_3(\log C)^3$$

Table A.1 lists the fit parameters.

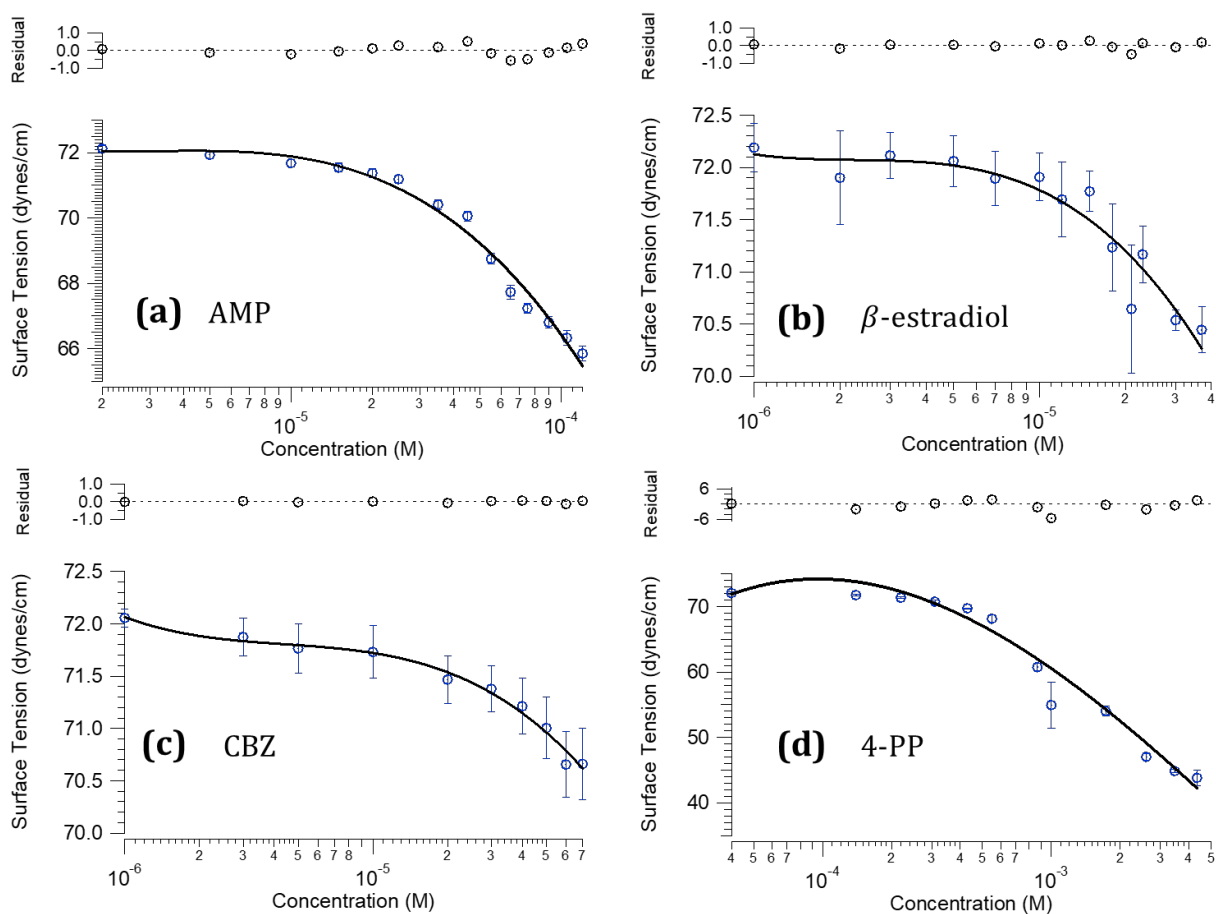

**Figure A.1** Surface tension vs. concentration (log-scale) data. The solid traces are polynomial fitting of the experimental data.

**Table A.1** Fitting parameters

|             | $A$     | $B_1$   | $B_2$  | $B_3$ |
|-------------|---------|---------|--------|-------|
| AMP         | -214.96 | -156.92 | -28.58 | -1.73 |
| CBZ         | 6.79    | -35.72  | -6.59  | -0.41 |
| $\beta$ -ED | -104.76 | -93.85  | -16.6  | -0.98 |
| 4-PP        | -24.10  | -10.78  | 12.89  | 2.36  |

Figure A.2 shows the  $\pi$  vs.  $A$  isotherm of DPPC and highlights the different phases and phase transitions. From low to high molecular area, the following phases are noted: gas (G), liquid expanded (LE), and liquid condensed (LC). The phase transitions from liquid-expanded phase to liquid-condensed phase (LC-LE), and gas to liquid expanded phase (LE-G) are also shown.

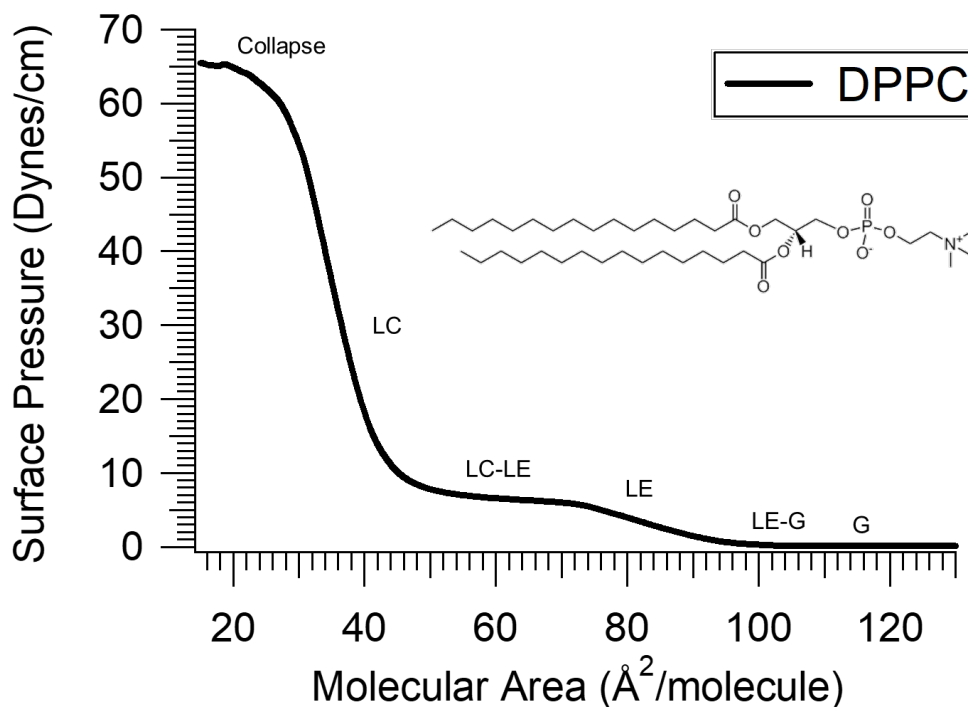

**Figure A.2** Surface pressure vs. molecular area ( $\pi$  vs.  $A$ ) isotherm of DPPC over pure Milli-Q water. Image of the molecular structure is from [avantilipids.com](http://avantilipids.com).
